# Supplementary material for: Satellitome Analysis of Rhodnius prolixus, One of the Main Chagas Disease Vector Species
Source: MDPI journal article supplement (doi:10.3390/ijms22116052), 2021-06-03
Supplement: s1 [file s1]

Supplementary Material

Satellitome analysis of *Rhodnius prolixus*, one of the main Chagas disease vector species

Eugenia E. Montiel, Francisco Panzera, Teresa Palomeque, Pedro Lorite, Sebastián Pita

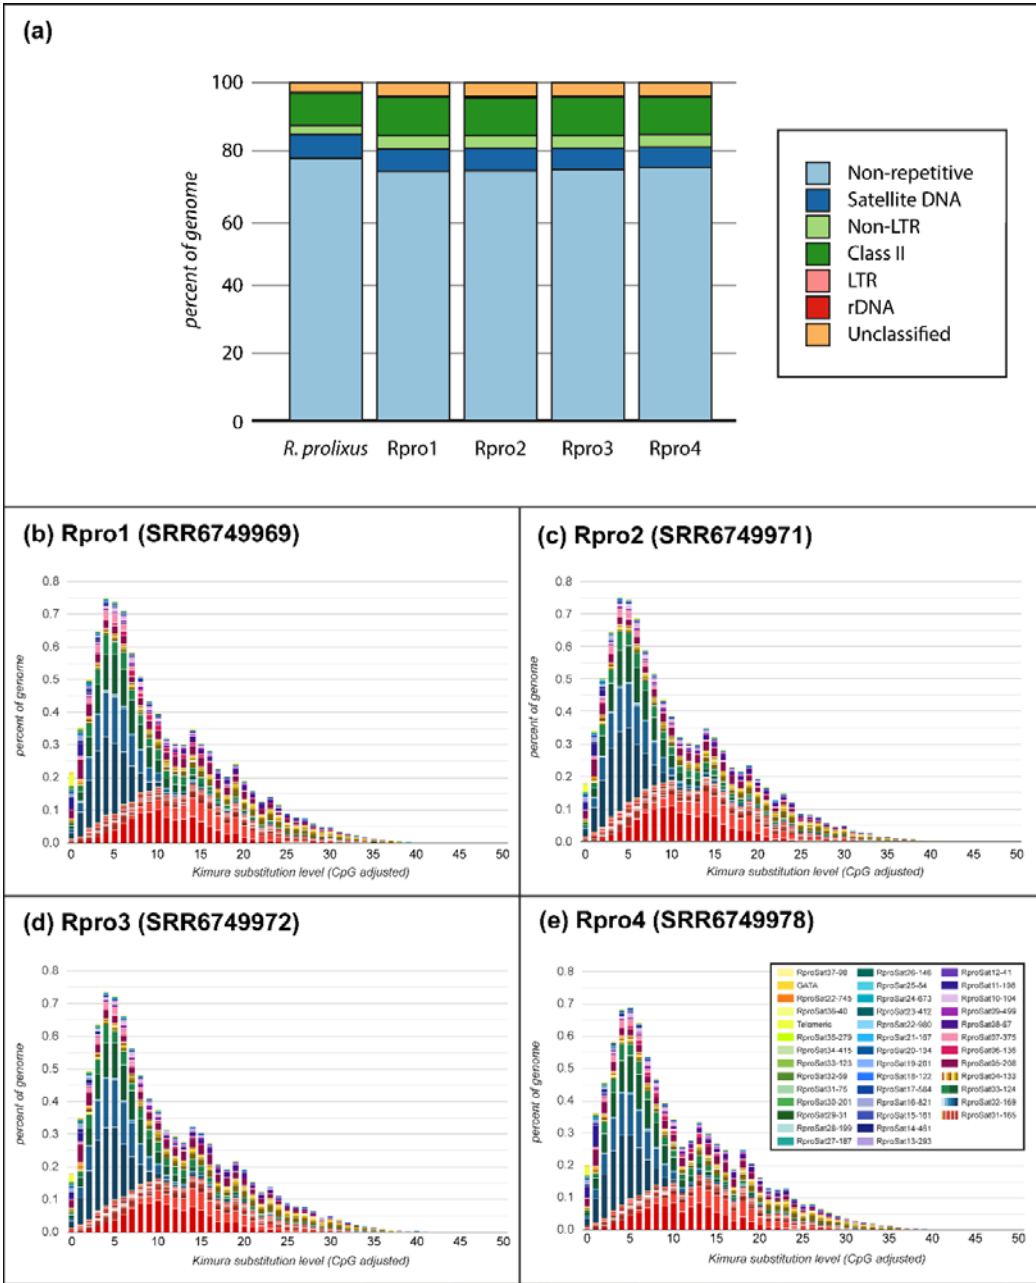

**Figure S1.** Repeat composition of *Rhodnius prolixus* genome obtained from RepeatExplorer annotation (a). Satellitome landscape of the satDNA families in NCBI samples (b-e).

(a)

```
122 130 140 150 160 170 180 190 200 210 221
RproSat07-375 GTAGTGACACCGTAAGCCACTCCCTCACCATAAAGCACAGTTATCCAGTACATAAAATGGTGCTCTTTCACATTCAATGATCTAGATTTTACTT
RproSat09-499 TTCTCCATAGGTATTTAATAAGAATGAATTTATGCATAAACAATAAATATTTTGAAGATTATTTTACGTTTCCACCATCAACTACGGTTTAT

222 230 240 250 260 270 280 290 300 310 321
RproSat07-375 TCTTTTACTCTCAGGAAAATATTCGTTAACTTTTTTGATTCTGCATTACATTAGAAGTATGAAACCGGAAATATAATGTTCAAAACATGTTTATTTTGA
RproSat09-499 GAATGATTGCAGAAATATGTTTATTCAATTATGATGTGCCATAATTTGATTGATTGAAGAAATTTGTCCGAATATAACAGTTAAGTTAAAAATACAT

101 110 120 130 140 150 160 170 180 190 200
RproSat07-375 CATTTTACGATATCAATTTTATTCATTATTCATTAATTTATCAATACCTATGCGGAAAAATAGTAAAAAAATTTAAAATAGTATTTTTCCTAG
RproSat09-499 TAATTTTGTAGTAAATTTTATTCATTATTCATTAATTTATGAATACCTATGCGGAAAAATAGTAAAAAAATTTAAAATATAGTATTTTACCGA

201 210 220 230 240 250 260 270 280 290 300
RproSat07-375 AAATAATTACCAAAACGATTGGCTAATCTCATTGGCGAAGCGGATGTGTGAAGTAGGCGGACTGTAGCTGATGAC
RproSat09-499 GATAATAAGCAATAAAAATCCTAATGGCGGATCAAAACAGCGTCTAGTGGCGGTGTATCTGCGCAATAGAACGCTAGGTAGGTAGGACTAGACCTCAC

301 310 320 330 340 350 360 370 380 390 400
RproSat09-499 TCCATTACACGCCACATACACTTTCTAACTTCCACCATTAAAGACTTTTTTACTCGTTTTTTCGTATCAAAAATGTACTTTTGAATTTTTTCACTATTTT

401 410 420 430 440 450 460 470 480 490 499
```

(b)

```
660 670 680 690 700 710 720 730 740 750 759
RproSat22-980 ACCAGCTAATCGTTGCAACCGATGCATAAATGCTGTAACTGCTCTACTATGTAACCTCCCAATGCATATTGATATATCTCAATGAAAAACGCTTGTCAAT
RproSat24-673 ATGAAAAAACAATTTTCTTTAAATGTACTTTTCTAAATAATCTCTGCAGTTAGCAATCGAGTATATTTTGGTACAACATAAAATAACTTTGT

673 680 690 700 710 720 730 740 750 759
RproSat22-980 GCACAGAGCCCTTTTCTTTTATTTTCAAGTGTTTTGAATAAATTTATGGTGTGAACCTCCCTCGAATTGAGTAACCTAAAAACAGAAAAATA
RproSat24-673 ATTGTTCTCTGATTACTAGAAATTTTGTAGGTTTCGCAATCT-ATATTGAAATGATAGTGAATGTTTATATCATTTATTTTATTTTATTTAC

760 770 780 790 800 810 820 830 840 850 859
RproSat22-980 AATTATATTTTGGTGCATTTTGGCGACGCTGATGTACGCCATATAT--CAATAAACATCTTTTGAATATCTTCTCAAGCGGAATTAATTAATATTTGT
RproSat24-673 CTTTATATTTTCTATTCCGGCGATGTCCATTTGTGAATTACAAATTTCTTCTTAATTCAGTTTAAAGCAACATCTAGCTCAACAAACATTTGCTAAA

860 870 880 890 900 910 920 930 940 950 957
RproSat22-980 AATTATATTTTGGTGCATTTTGGCGACGCTGATGTACGCCATATAT--CAATAAACATCTTTTGAATATCTTCTCAAGCGGAATTAATTAATATTTGT
RproSat24-673 CTTTATATTTTCTATTCCGGCGATGTCCATTTGTGAATTACAAATTTCTTCTTAATTCAGTTTAAAGCAACATCTAGCTCAACAAACATTTGCTAAA

958 960 970 980 990 1000 1010 1020 1030 1040 1047
RproSat22-980 TGAAAAATTTTATACGTGCTCTTCCCGCACGTAATCGTCGCGCGCAACCTTACGTTTGGCGGCGCCGGAATAGTAGTACCTTTAGTACAAAAA
RproSat24-673 ATAAATAATGATACGTGCTCTTCCCGCACGTAATCGTCGCGCGCGCTCCCTAATGATGCGGACGCGGATATTAGCTAGTTACATCAGCAGAAAA

1048 1050 1060 1070 1080 1090 1100 1110 1120 1130 1137
RproSat22-980 AAAACTTCTTCAATGCTTTTAAAGACAAATGCTATGCTTAGAGATTATTTGTAATTTCTTAGAATGATTGATATTAGCTCAATGACTTCTTTGTAC
RproSat24-673 GAGAGTATCTTATGCTTACTGTAAATAATACGTAACTTAAATATGCTTTTCAATATGTGTGCGACTCCGTACACAGATGATGATTTGATTGGATT

1138 1140 1150 1160 1170 1180 1190 1200 1210 1220 1227
RproSat22-980 TAGAAATATCCACATGTTGTGAACCTAAAAAATAAATATGTAATTTTCTTTATTTATATTTTCCCTATCATTAACGATTTTTATGGCTGT
RproSat24-673 TTTTCAGTGTTTTAACTCACTTTTATCTGTGTACCTAAACTACAAATATCGAGTACCTTTTATTCGGTAATTTGTATGTGTACTAATCATGAGTTT

1228 1230 1240 1250 1260 1270 1280 1290 1300 1310 1317
RproSat22-980 CTATGTGATTAGTTTATTTTACGGGTATTGAATTTATAAAATGCTGAATAAAATATATAGTACTATAATATATGCAATGACCTTCAGAATAT
RproSat24-673 TCGTCTTCTATTGAGATCCTATGTTATCATTTGGTCACATTAGGCAATGCTTCTTACATTACTGATTAATAGAA

1318 1320 1330 1340 1350 1360 1370 1380 1390 1400 1407
RproSat22-980 CGTCGCCCCGTCTTTATGATTGTGGTGCAAGCAGTGTAAATAGTTAAGGAAAGAGATATTGAAACATCGTAATTTACCTAATTAATAAAGAAATAACT
RproSat24-673

1408 1410 1420 1430 1440 1450 1460 1470 1480 1490 1497
RproSat22-980 ATACTGCAACATCCATCTTAATTTTAATTTTCGTTCTTATATTTGAATGTATTCTGTTTATTTTGGTGCATAATTTCTGATTATGTAGCGTAATCTA
RproSat24-673

1498 1500 1510 1520 1530 1540 1550 1560 1570 1580 1587
RproSat22-980 AAACAGAAATTTGAAGGATACGTGTTATAGTTAGGATGAAAAAATACTGCTAAAAAGTTTATATAGGCTCTTTT
RproSat24-673
```

**Figure S2.** Alignment of consensus sequences of satDNA families with similarity: RproSat07-375 and RproSat09-499 (a), and RproSat22-980 and Rpro24-675 (b). Similar positions are marked with red font and red boxes indicate regions with high similarity. Sequences are numbered according to the original position of consensus sequences.

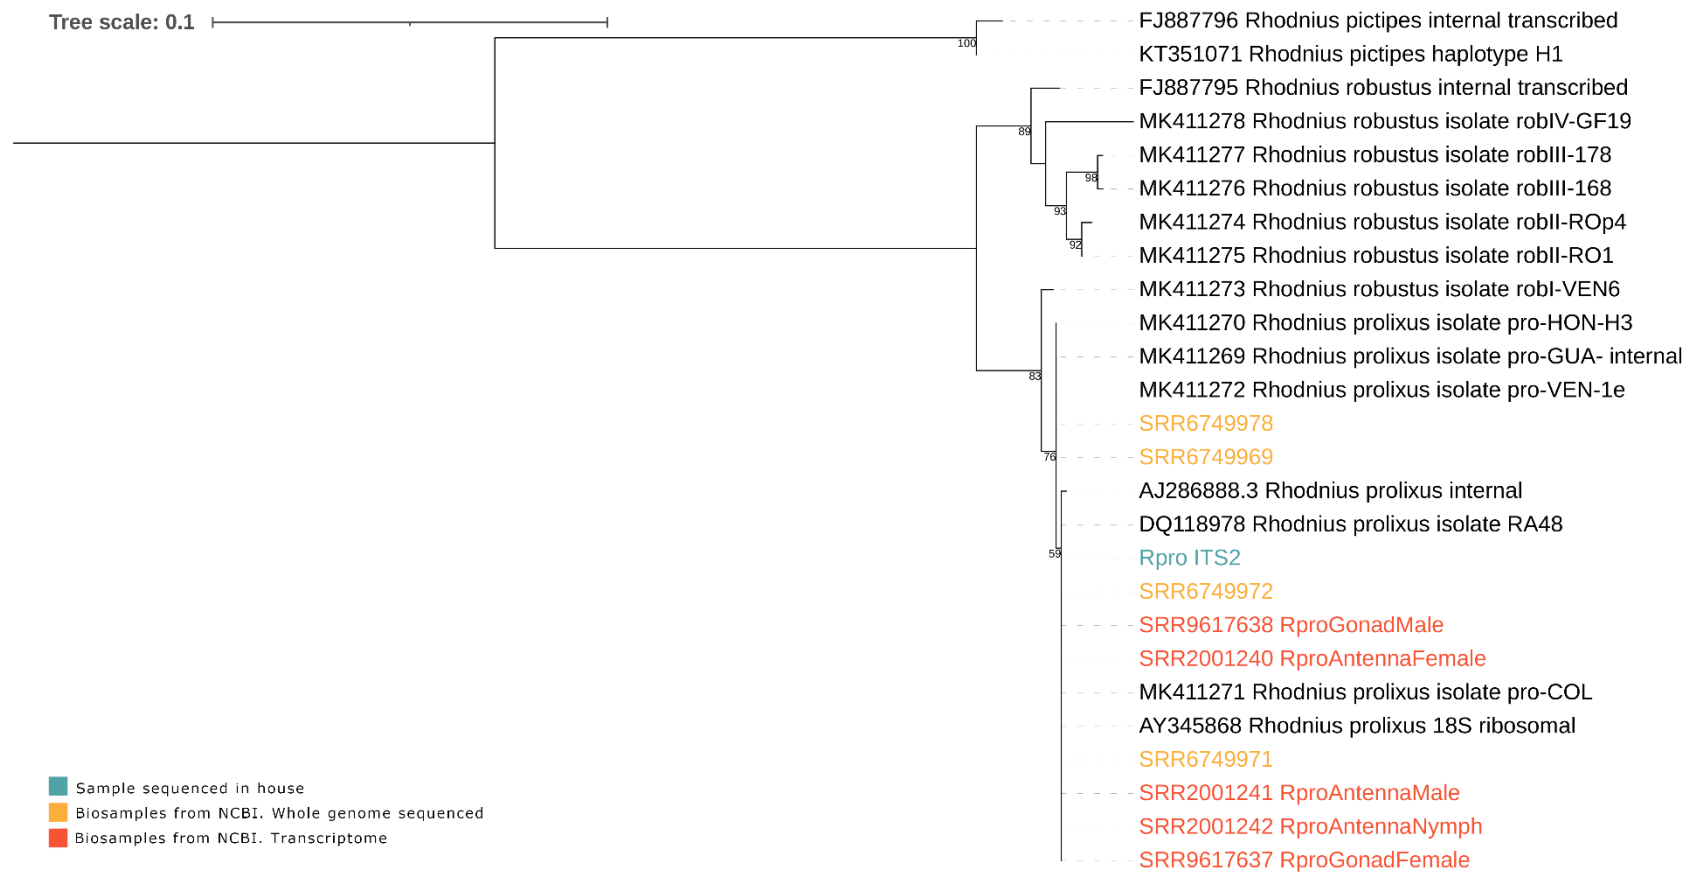

Figure S3. ML phylogenetic tree depicting the position of samples used in our study within *Rhodnius prolixus*.

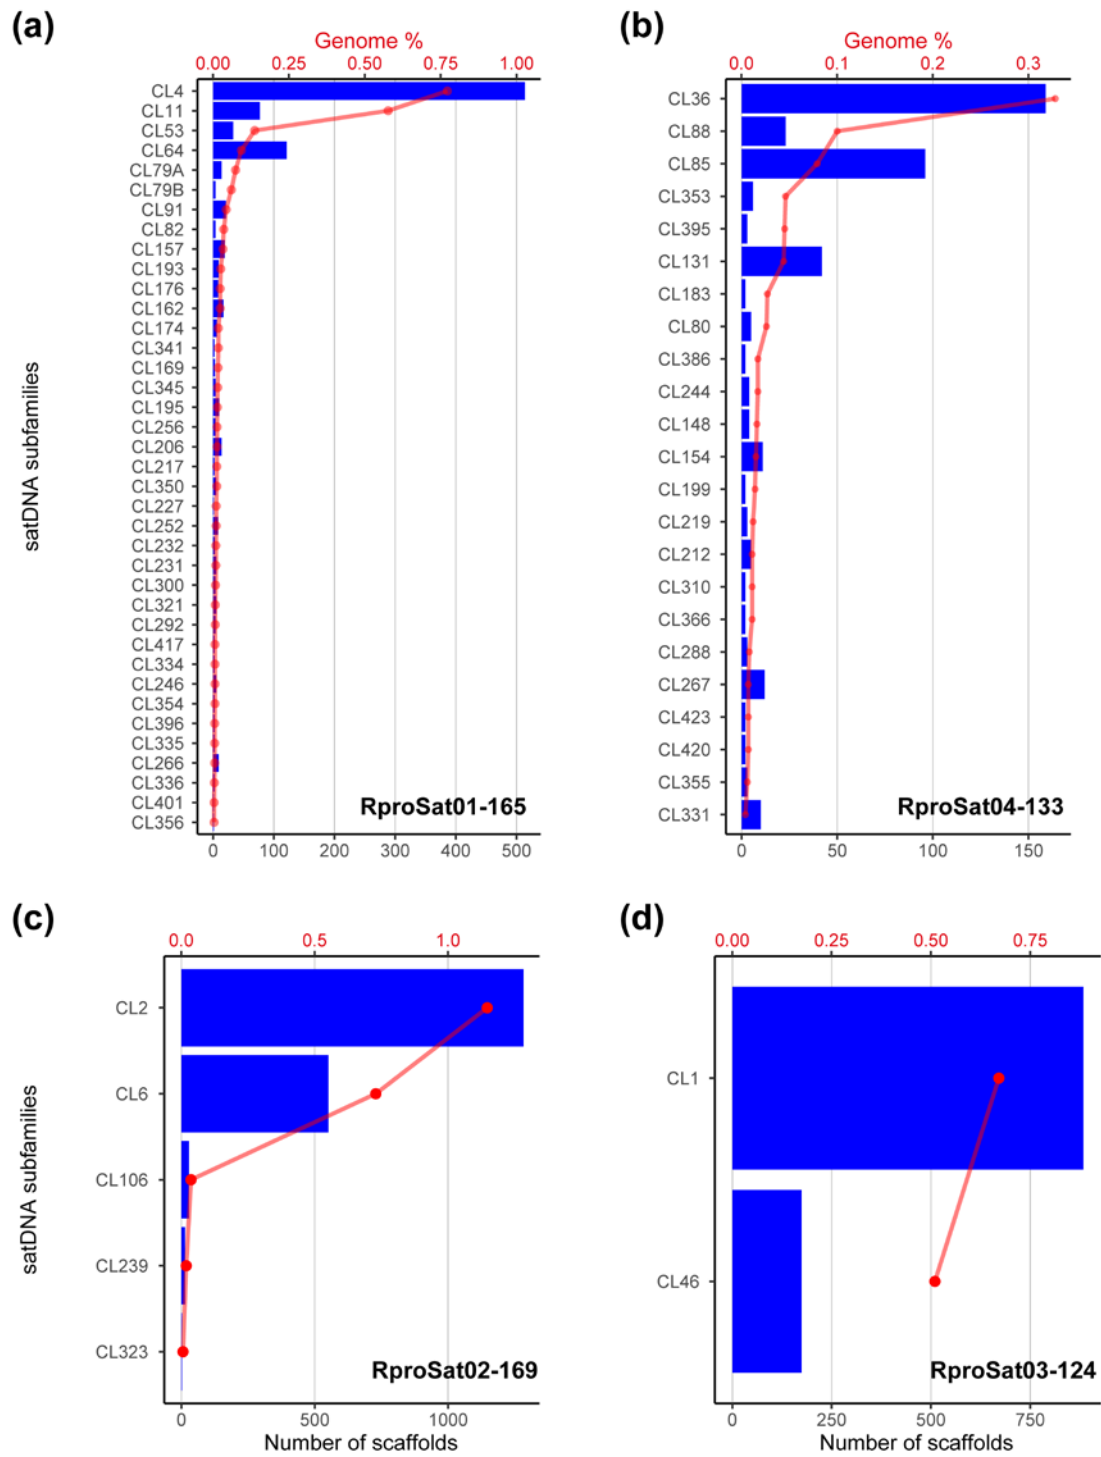

Figure S4. Number of scaffolds where subfamilies are distributed on *Rhodnius prolixus* genome assembly.

**(a) RproSat01-165**

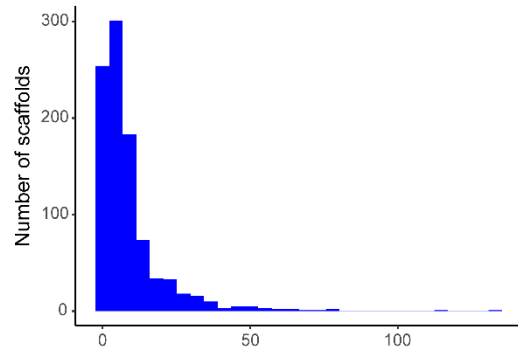

**(b) RproSat02-169**

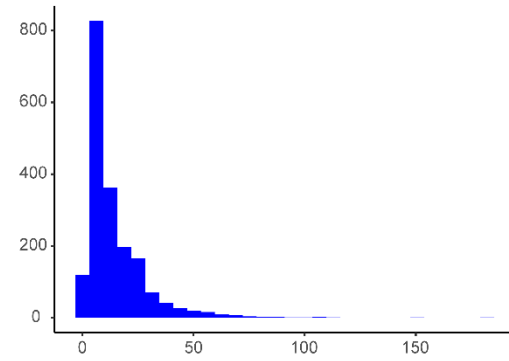

**(c) RproSat03-124**

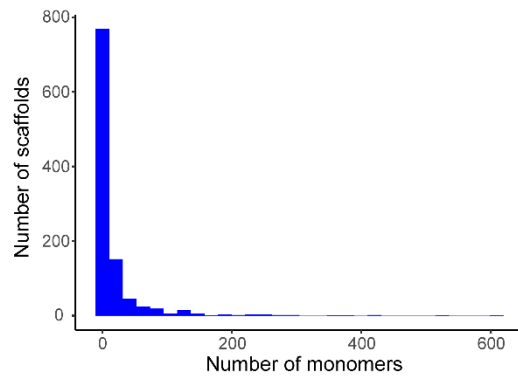

**(d) RproSat04-133**

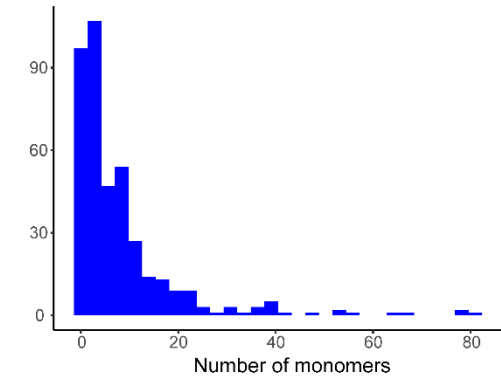

Figure S5. Monomer distribution of most abundant satDNA families in *Rhodnius prolixus* assembled genome. Histograms relate number of scaffolds and monomers. For all families, long arrays are present on few scaffolds.

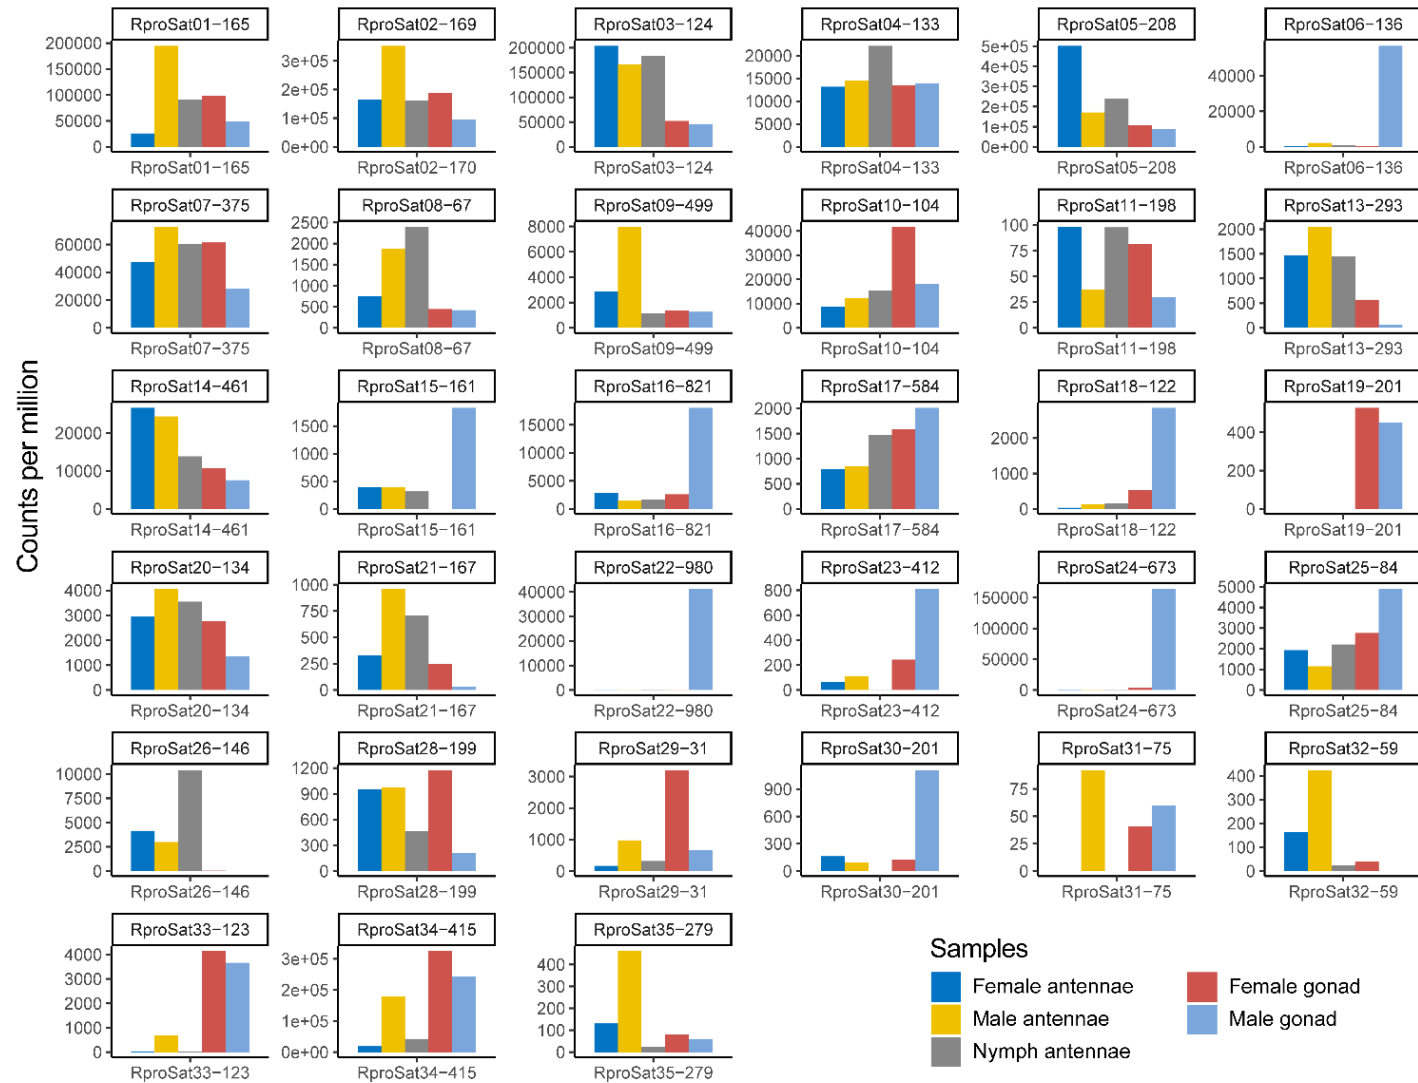

Figure S6. SatDNA transcription in different tissues.

**Table S1:** Estimations of genome abundance and nucleotide divergence of satDNA families and subfamilies found in *Rhodnius prolixus* genome sequenced in this work (Rpro) and in pseudo-reads generated from *Rhodnius prolixus* genome assembly (GCA\_000181055.3) (RproSim). Subfamilies' names are followed by the size of their consensus sequence. Table also shows the same data for available NCBI *Rhodnius prolixus* raw reads from genomic DNA: Rpro1 (SRR6749969), Rpro2 (SRR6749971), Rpro3 (SRR6749972) and Rpro4 (SRR6749978).

| SatDNA Family | SatDNA Subfamily | Rpro<br>Genome<br>Prop. (%) | Kimura<br>Diverg.<br>(%) | RproSim<br>Genome<br>Prop. (%) | Kimura<br>Diverg.<br>(%) | Rpro1<br>Genome<br>Prop. (%) | Kimura<br>Diverg.<br>(%) | Rpro2<br>Genome<br>Prop. (%) | Kimura<br>Diverg.<br>(%) | Rpro3<br>Genome<br>Prop. (%) | Kimura<br>Diverg.<br>(%) | Rpro4<br>Genome<br>Prop.<br>(%) | Kimura<br>Diverg.<br>(%) |
|---------------|------------------|-----------------------------|--------------------------|--------------------------------|--------------------------|------------------------------|--------------------------|------------------------------|--------------------------|------------------------------|--------------------------|---------------------------------|--------------------------|
| RproSat01-165 |                  | 2.131                       | 13.42                    | 1.159                          | 16.10                    | 2.723                        | 12.87                    | 3.075                        | 12.73                    | 2.652                        | 12.97                    | 2.504                           | 12.48                    |
|               | CL4-165          | 0.772                       | 12.26                    | 0.398                          | 12.24                    | 1.084                        | 11.77                    | 1.229                        | 11.92                    | 1.046                        | 11.89                    | 1.005                           | 11.83                    |
|               | CL11-166         | 0.577                       | 17.31                    | 0.335                          | 17.39                    | 0.650                        | 16.33                    | 0.687                        | 16.3                     | 0.570                        | 16.24                    | 0.590                           | 16.16                    |
|               | CL53-165         | 0.137                       | 16.97                    | 0.104                          | 17.75                    | 0.161                        | 16.69                    | 0.170                        | 16.92                    | 0.183                        | 16.15                    | 0.152                           | 16.78                    |
|               | CL64-166         | 0.093                       | 6.42                     | 0.058                          | 6.35                     | 0.108                        | 5.99                     | 0.135                        | 6.17                     | 0.115                        | 6.16                     | 0.105                           | 6.22                     |
|               | CL79A-178        | 0.074                       | 17.98                    | 0.032                          | 18.08                    | 0.100                        | 16.32                    | 0.112                        | 16.44                    | 0.102                        | 16.13                    | 0.088                           | 15.84                    |
|               | CL79B-166        | 0.060                       | 21                       | 0.029                          | 21.73                    | 0.078                        | 19.32                    | 0.092                        | 19.34                    | 0.084                        | 19.73                    | 0.074                           | 18.78                    |
|               | CL91-166         | 0.043                       | 12.63                    | 0.021                          | 13.63                    | 0.066                        | 13.57                    | 0.071                        | 14.26                    | 0.063                        | 14.07                    | 0.056                           | 13.55                    |
|               | CL82-178         | 0.035                       | 14.24                    | 0.006                          | 19.37                    | 0.037                        | 13.23                    | 0.050                        | 11.04                    | 0.041                        | 11.86                    | 0.033                           | 11.85                    |
|               | CL157-166        | 0.032                       | 14.21                    | 0.018                          | 13.94                    | 0.053                        | 14.7                     | 0.068                        | 13.6                     | 0.075                        | 13.05                    | 0.054                           | 13.57                    |
|               | CL193-165        | 0.025                       | 23.15                    | 0.019                          | 22.55                    | 0.027                        | 20.66                    | 0.028                        | 23.22                    | 0.033                        | 20.21                    | 0.031                           | 20.56                    |
|               | CL176-165        | 0.023                       | 13.29                    | 0.014                          | 22.52                    | 0.027                        | 12.29                    | 0.035                        | 12.12                    | 0.025                        | 13.29                    | 0.029                           | 10.6                     |
|               | CL162-165        | 0.023                       | 12.64                    | 0.013                          | 13.9                     | 0.024                        | 11                       | 0.037                        | 11.09                    | 0.030                        | 11.53                    | 0.028                           | 10.75                    |
|               | CL174-165        | 0.017                       | 9.77                     | 0.008                          | 14.54                    | 0.024                        | 10.51                    | 0.028                        | 9.79                     | 0.018                        | 10.73                    | 0.023                           | 10.22                    |
|               | CL341-165        | 0.017                       | 22.23                    | 0.010                          | 25.77                    | 0.017                        | 19.84                    | 0.015                        | 19.32                    | 0.015                        | 20.28                    | 0.014                           | 20.17                    |
|               | CL169-166        | 0.016                       | 4.34                     | 0.001                          | 7                        | 0.010                        | 3.7                      | 0.019                        | 3.55                     | 0.013                        | 3.92                     | 0.010                           | 4.36                     |
|               | CL345-165        | 0.015                       | 17.92                    | 0.010                          | 21.82                    | 0.020                        | 16.43                    | 0.022                        | 15.09                    | 0.018                        | 15.98                    | 0.019                           | 14.93                    |
|               | CL195-165        | 0.014                       | 12.04                    | 0.005                          | 13.8                     | 0.025                        | 14.1                     | 0.034                        | 12.77                    | 0.027                        | 16.17                    | 0.016                           | 16.1                     |
|               | CL256-167        | 0.013                       | 20.41                    | 0.006                          | 25.4                     | 0.017                        | 17.74                    | 0.021                        | 17.24                    | 0.016                        | 18.67                    | 0.014                           | 17.93                    |
|               | CL206-167        | 0.013                       | 11.54                    | 0.008                          | 11                       | 0.016                        | 11.19                    | 0.017                        | 11.25                    | 0.015                        | 10.77                    | 0.016                           | 11.7                     |
|               | CL217-167        | 0.012                       | 5.14                     | 0.002                          | 12.57                    | 0.012                        | 6.82                     | 0.007                        | 5.69                     | 0.006                        | 7.6                      | 0.009                           | 5.38                     |
|               | CL350-165        | 0.012                       | 21.67                    | 0.008                          | 24.06                    | 0.023                        | 16.28                    | 0.021                        | 16.45                    | 0.012                        | 17.71                    | 0.014                           | 18.38                    |
|               | CL227-168        | 0.010                       | 8.62                     | 0.003                          | 18.36                    | 0.011                        | 17.67                    | 0.015                        | 14.23                    | 0.017                        | 13.04                    | 0.012                           | 13.55                    |
|               | CL252-165        | 0.010                       | 7.88                     | 0.004                          | 12.2                     | 0.016                        | 10.85                    | 0.015                        | 12.13                    | 0.015                        | 9.99                     | 0.014                           | 9.19                     |
|               | CL232-165        | 0.009                       | 9.91                     | 0.006                          | 9.98                     | 0.015                        | 9.43                     | 0.020                        | 9.03                     | 0.011                        | 9.92                     | 0.013                           | 8.64                     |
|               | CL231-165        | 0.009                       | 11.18                    | 0.005                          | 12.47                    | 0.014                        | 11.84                    | 0.013                        | 12.83                    | 0.013                        | 13.22                    | 0.010                           | 12.44                    |
|               | CL300-165        | 0.008                       | 15.14                    | 0.004                          | 14.1                     | 0.012                        | 15.42                    | 0.010                        | 16.34                    | 0.012                        | 16.52                    | 0.010                           | 15.64                    |

|               |           |       |       |        |       |       |       |       |       |       |       |       |       |
|---------------|-----------|-------|-------|--------|-------|-------|-------|-------|-------|-------|-------|-------|-------|
| RproSat02-169 | CL321-165 | 0.007 | 8.55  | 0.003  | 11.13 | 0.011 | 10.41 | 0.019 | 7.98  | 0.013 | 7.82  | 0.009 | 9.79  |
|               | CL292-165 | 0.007 | 9.15  | 0.003  | 16.23 | 0.010 | 7.51  | 0.013 | 5.97  | 0.008 | 9.86  | 0.014 | 5.75  |
|               | CL417-165 | 0.006 | 20.05 | 0.003  | 24.09 | 0.007 | 12.24 | 0.008 | 15.3  | 0.006 | 15.27 | 0.004 | 12.12 |
|               | CL334-165 | 0.006 | 18.45 | 0.004  | 18.75 | 0.005 | 12.89 | 0.006 | 15.17 | 0.006 | 11.22 | 0.005 | 10.79 |
|               | CL246-167 | 0.006 | 15.23 | 0.003  | 14.09 | 0.009 | 14.31 | 0.012 | 14.63 | 0.011 | 13.52 | 0.007 | 13.13 |
|               | CL354-173 | 0.006 | 10.97 | 0.003  | 17.35 | 0.005 | 11.69 | 0.005 | 10.04 | 0.006 | 9.49  | 0.005 | 8.92  |
|               | CL396-165 | 0.005 | 19.31 | 0.003  | 17.46 | 0.006 | 13.36 | 0.007 | 13.45 | 0.004 | 17.88 | 0.005 | 11.03 |
|               | CL335-165 | 0.005 | 6.65  | 0.001  | 15.46 | 0.008 | 9.63  | 0.011 | 10.05 | 0.006 | 12.64 | 0.004 | 13.39 |
|               | CL266-178 | 0.005 | 12.14 | 0.001  | 13.02 | 0.003 | 9.77  | 0.006 | 11.03 | 0.002 | 9.4   | 0.004 | 8.47  |
|               | CL336-154 | 0.004 | 8.14  | 0.003  | 16.83 | 0.004 | 8.89  | 0.005 | 8.2   | 0.003 | 8.74  | 0.003 | 10.49 |
|               | CL401-165 | 0.003 | 15.97 | 0.001  | 17.23 | 0.007 | 17.36 | 0.008 | 14.35 | 0.008 | 15.05 | 0.004 | 18.06 |
|               | CL356-165 | 0.003 | 5.52  | 0.0005 | 7.47  | 0.003 | 7.34  | 0.003 | 9.27  | 0.004 | 7.08  | 0.003 | 7.26  |
|               |           | 1.936 | 9.81  | 0.883  | 11.35 | 2.318 | 8.42  | 2.329 | 8.91  | 2.370 | 8.72  | 2.100 | 8.64  |
|               | CL2-169   | 1.147 | 5.2   | 0.586  | 5.14  | 1.331 | 4.89  | 1.353 | 4.98  | 1.354 | 4.89  | 1.204 | 4.92  |
|               | CL6-170   | 0.729 | 5.93  | 0.266  | 6.03  | 0.891 | 5.65  | 0.867 | 5.73  | 0.916 | 5.59  | 0.815 | 5.7   |
| RproSat03-124 | CL106-169 | 0.036 | 14.63 | 0.019  | 13.66 | 0.058 | 12.99 | 0.068 | 13.64 | 0.064 | 13.1  | 0.051 | 12.35 |
|               | CL239-170 | 0.018 | 16.06 | 0.010  | 18.08 | 0.031 | 11.29 | 0.034 | 11.05 | 0.029 | 12.95 | 0.024 | 11.85 |
|               | CL323-170 | 0.006 | 7.22  | 0.001  | 13.86 | 0.008 | 7.28  | 0.007 | 9.15  | 0.007 | 7.08  | 0.005 | 8.39  |
|               |           | 1.182 | 8.81  | 1.35   | 8.94  | 1.476 | 7.81  | 1.397 | 7.85  | 1.375 | 7.93  | 1.326 | 7.72  |
| RproSat04-133 | CL1-124   | 0.671 | 7.27  | 0.725  | 7.34  | 0.908 | 6.86  | 0.872 | 6.85  | 0.848 | 6.92  | 0.857 | 6.93  |
|               | CL46-130  | 0.510 | 10.35 | 0.627  | 10.54 | 0.567 | 8.75  | 0.525 | 8.84  | 0.527 | 8.93  | 0.469 | 8.5   |
|               |           | 0.861 | 17.38 | 0.510  | 21.78 | 0.979 | 16.10 | 0.967 | 17.19 | 1.023 | 15.79 | 0.940 | 15.63 |
|               | CL36-133  | 0.328 | 19.69 | 0.200  | 19.77 | 0.403 | 19.28 | 0.373 | 19.43 | 0.404 | 19.38 | 0.358 | 19.44 |
|               | CL88-134  | 0.100 | 21.17 | 0.016  | 18.6  | 0.092 | 17.81 | 0.086 | 17.39 | 0.081 | 17.63 | 0.073 | 17.43 |
|               | CL85-133  | 0.079 | 18.03 | 0.066  | 17.75 | 0.089 | 15.88 | 0.089 | 16.53 | 0.093 | 16    | 0.077 | 16.46 |
|               | CL353-133 | 0.046 | 23.72 | 0.041  | 23.08 | 0.037 | 21.56 | 0.042 | 21.28 | 0.044 | 21.1  | 0.040 | 21.44 |
|               | CL395-132 | 0.045 | 26.54 | 0.033  | 26.96 | 0.044 | 24.12 | 0.048 | 19.66 | 0.050 | 22.36 | 0.040 | 23.36 |
|               | CL131-132 | 0.044 | 19.31 | 0.042  | 17.88 | 0.065 | 16.74 | 0.076 | 17.02 | 0.075 | 16.99 | 0.069 | 17.5  |
|               | CL183-133 | 0.027 | 18    | 0.013  | 29.04 | 0.025 | 14.05 | 0.027 | 11.81 | 0.029 | 10.59 | 0.038 | 8.58  |
|               | CL80-134  | 0.026 | 23.85 | 0.013  | 26.6  | 0.024 | 22.22 | 0.018 | 22.88 | 0.028 | 21.23 | 0.023 | 21.12 |
|               | CL386-133 | 0.017 | 25.64 | 0.007  | 28.38 | 0.015 | 24.17 | 0.015 | 20.82 | 0.017 | 22.61 | 0.017 | 22.44 |
|               | CL244-131 | 0.017 | 20.18 | 0.011  | 20.99 | 0.017 | 18.68 | 0.019 | 18.34 | 0.019 | 19    | 0.022 | 17.79 |
|               | CL148-133 | 0.016 | 11.51 | 0.007  | 17.4  | 0.028 | 9.16  | 0.039 | 9.47  | 0.034 | 7.99  | 0.028 | 10.25 |
|               | CL154-133 | 0.015 | 16.1  | 0.009  | 18.15 | 0.010 | 18.3  | 0.012 | 18.23 | 0.014 | 17.57 | 0.015 | 14.83 |
|               | CL199-132 | 0.014 | 15.73 | 0.004  | 19.99 | 0.016 | 16.14 | 0.017 | 14.85 | 0.013 | 15.54 | 0.017 | 15.57 |
|               | CL219-132 | 0.012 | 9.49  | 0.007  | 22.87 | 0.018 | 9.28  | 0.029 | 7.82  | 0.024 | 8.56  | 0.021 | 7.86  |
|               | CL212-133 | 0.011 | 10.5  | 0.006  | 13.49 | 0.010 | 11.78 | 0.012 | 9.07  | 0.013 | 10.03 | 0.010 | 10.24 |
|               | CL310-134 | 0.011 | 16.84 | 0.005  | 35.05 | 0.026 | 8.55  | 0.011 | 17.4  | 0.028 | 7.85  | 0.041 | 7.34  |
|               | CL366-133 | 0.011 | 11.85 | 0.004  | 20.27 | 0.010 | 18.37 | 0.014 | 17.29 | 0.009 | 18.31 | 0.009 | 18.8  |



|               |            |       |       |        |       |       |       |       |       |       |       |       |       |
|---------------|------------|-------|-------|--------|-------|-------|-------|-------|-------|-------|-------|-------|-------|
|               | CL288-132  | 0.008 | 20.12 | 0.004  | 23.35 | 0.010 | 16.92 | 0.008 | 18.47 | 0.010 | 16.64 | 0.007 | 18.95 |
|               | CL267-132  | 0.007 | 11.02 | 0.006  | 10.16 | 0.011 | 9.21  | 0.013 | 10.29 | 0.009 | 9.33  | 0.011 | 10.25 |
|               | CL423-132  | 0.007 | 14.8  | 0.004  | 32.56 | 0.009 | 22.25 | 0.005 | 28.34 | 0.008 | 21.42 | 0.009 | 20.84 |
|               | CL420-132  | 0.007 | 15.24 | 0.004  | 21.37 | 0.007 | 13.78 | 0.003 | 24.28 | 0.010 | 19.59 | 0.004 | 16.07 |
|               | CL355-132  | 0.006 | 14.06 | 0.003  | 14.59 | 0.004 | 10.09 | 0.006 | 11.73 | 0.006 | 11.41 | 0.005 | 8.61  |
|               | CL331-133  | 0.004 | 16.32 | 0.004  | 22.67 | 0.008 | 11.96 | 0.005 | 22.98 | 0.007 | 12    | 0.006 | 14.41 |
| RproSat05-208 |            | 0.460 | 15.48 | 0.840  | 13.38 | 0.701 | 12.09 | 0.654 | 12.07 | 0.664 | 12.19 | 0.634 | 12.11 |
| RproSat06-136 |            | 0.320 | 12.42 | 0.133  | 12.29 | 0.176 | 11.32 | 0.011 | 10    | 0.041 | 10.98 | 0.154 | 11.42 |
| RproSat07-375 |            | 0.200 | 7.77  | 0.101  | 9.13  | 0.193 | 6.35  | 0.187 | 6.94  | 0.186 | 6.56  | 0.163 | 6.75  |
| RproSat08-67  |            | 0.194 | 20.58 | 0.173  | 20.64 | 0.261 | 18.46 | 0.245 | 18.37 | 0.262 | 18.18 | 0.245 | 18.56 |
| RproSat09-499 |            | 0.107 | 12.2  | 0.046  | 11.91 | 0.097 | 12.09 | 0.096 | 12.15 | 0.089 | 12.37 | 0.090 | 12.17 |
| RproSat10-104 |            | 0.085 | 10.1  | 0.099  | 10.19 | 0.132 | 9.52  | 0.137 | 9.75  | 0.129 | 9.75  | 0.131 | 9.51  |
| RproSat11-198 |            | 0.073 | 2.23  | 0.008  | 3.81  | 0.100 | 2.41  | 0.125 | 3.33  | 0.063 | 2.13  | 0.125 | 1.53  |
| RproSat12-41  |            | 0.069 | 10.03 |        |       |       |       |       |       |       |       |       |       |
| RproSat13-293 |            | 0.067 | 28.28 | 0.078  | 28.74 | 0.044 | 24.82 | 0.040 | 25.73 | 0.043 | 25.57 | 0.038 | 24.9  |
| RproSat14-461 |            | 0.062 | 6.19  | 0.015  | 8.2   | 0.061 | 4.83  | 0.040 | 5.58  | 0.058 | 4.74  | 0.049 | 4.88  |
| RproSat15-161 |            | 0.052 | 8.38  | 0.013  | 7.8   | 0.031 | 7.69  | 0.001 | 7.31  | 0.009 | 6.67  | 0.029 | 6.18  |
| RproSat16-821 |            | 0.044 | 6.83  | 0.025  | 14.24 | 0.065 | 6.05  | 0.063 | 5.53  | 0.056 | 5.21  | 0.053 | 6.36  |
| RproSat17-584 |            | 0.027 | 11.71 | 0.016  | 22.49 | 0.025 | 8.9   | 0.028 | 6.8   | 0.026 | 7.76  | 0.025 | 7.54  |
| RproSat18-122 |            | 0.019 | 25.27 | 0.026  | 24.56 | 0.028 | 22.77 | 0.026 | 22.32 | 0.027 | 22.19 | 0.025 | 23.37 |
| RproSat19-201 |            | 0.019 | 19.52 | 0.020  | 23.86 | 0.014 | 15.94 | 0.020 | 13.06 | 0.015 | 15.91 | 0.014 | 17.32 |
| RproSat20-134 |            | 0.017 | 16.23 | 0.018  | 16.96 | 0.018 | 12.52 | 0.017 | 13.99 | 0.018 | 13.75 | 0.020 | 12.46 |
| RproSat21-167 |            | 0.016 | 16.25 | 0.013  | 14.21 | 0.020 | 13.78 | 0.024 | 13.71 | 0.022 | 13.12 | 0.018 | 14.28 |
| RproSat22-980 |            | 0.013 | 4.75  | 0.005  | 6.33  | 0.012 | 4.29  | 0.012 | 4.48  | 0.010 | 5.01  | 0.011 | 3.45  |
|               | CL166A-980 | 0.012 | 5.57  | 0.004  | 5.41  | 0.011 | 4.68  | 0.011 | 4.23  | 0.010 | 4.24  | 0.010 | 4.13  |
|               | CL166B-745 | 0.002 | 3.92  | 0.001  | 7.25  | 0.001 | 3.89  | 0.002 | 4.73  | 0.001 | 5.78  | 0.001 | 2.76  |
| RproSat23-412 |            | 0.010 | 5.59  | 0.004  | 5.77  | 0.012 | 4.73  | 0.005 | 6.31  | 0.004 | 5.19  | 0.009 | 5.31  |
| RproSat24-673 |            | 0.009 | 2.89  | 0.002  | 5.43  | 0.013 | 2.96  | 0.011 | 3.25  | 0.012 | 2.8   | 0.013 | 2.72  |
| RproSat25-84  |            | 0.009 | 25.75 | 0.008  | 26.89 | 0.010 | 24.62 | 0.009 | 23.75 | 0.009 | 24.41 | 0.008 | 24.19 |
| RproSat26-146 |            | 0.009 | 3.55  | 0.002  | 10.62 | 0.005 | 4.28  | 0.004 | 4.42  | 0.011 | 3.23  | 0.005 | 3.8   |
| RproSat27-187 |            | 0.008 | 13.06 |        |       |       |       |       |       |       |       |       |       |
| RproSat28-199 |            | 0.008 | 12.72 | 0.010  | 12.02 | 0.011 | 9.4   | 0.014 | 8.3   | 0.011 | 8.51  | 0.009 | 9.05  |
| RproSat29-31  |            | 0.006 | 11.21 | 0.013  | 10.75 | 0.010 | 10.22 | 0.013 | 10.9  | 0.008 | 10.61 | 0.010 | 9.68  |
| RproSat30-201 |            | 0.006 | 3.02  | 0.002  | 7.77  | 0.009 | 1.82  | 0.002 | 3.52  | 0.006 | 2.11  | 0.005 | 5.51  |
| RproSat31-75  |            | 0.005 | 2.64  | 0.0002 | 2.37  | 0.005 | 1.97  | 0.007 | 2.06  | 0.005 | 2.04  | 0.005 | 1.72  |
| RproSat32-59  |            | 0.004 | 0.88  | 0.0003 | 0.22  | 0.009 | 0.52  |       |       | 0.005 | 0.74  | 0.003 | 0.5   |
| RproSat33-123 |            | 0.003 | 0.96  |        |       | 0.003 | 0.45  | 0.003 | 0.76  | 0.002 | 0.51  | 0.002 | 0.39  |
| RproSat34-415 |            | 0.003 | 5.15  | 0.003  | 7.15  | 0.003 | 10.26 | 0.003 | 6.33  | 0.005 | 6.62  | 0.003 | 7.35  |
| RproSat35-279 |            | 0.003 | 5.71  | 0.001  | 7.02  | 0.002 | 8.16  | 0.003 | 3.1   | 0.004 | 5.69  | 0.003 | 6.08  |

|                  |        |       |       |       |       |       |        |      |        |      |        |      |
|------------------|--------|-------|-------|-------|-------|-------|--------|------|--------|------|--------|------|
| RproSat36-40     | 0.003  | 4.17  | 0.001 | 4.76  | 0.001 | 4.8   | 0.000  | 3    | 0.002  | 4.6  | 0.001  | 4.43 |
| RproSat37-98     | 0.0005 | 6.96  |       |       | 0.001 | 10.03 | 0.0002 | 9.18 | 0.0003 | 2.89 | 0.0002 | 2.48 |
| Telomeric repeat | 0.003  | 13.86 | 0.007 | 11.91 | 0.048 | 2.38  | 0.035  | 2.75 | 0.030  | 3.06 | 0.037  | 2.47 |
| (GATA)n repeat   | 0.001  | 10.09 | 0.002 | 12.21 | 0.005 | 2.27  | 0.002  | 8.36 | 0.002  | 7.7  | 0.004  | 4.21 |

|              |              |       |              |       |              |      |              |      |              |      |              |      |
|--------------|--------------|-------|--------------|-------|--------------|------|--------------|------|--------------|------|--------------|------|
| <b>Total</b> | <b>8.046</b> |       | <b>5.585</b> |       | <b>9.622</b> |      | <b>9.608</b> |      | <b>9.255</b> |      | <b>8.809</b> |      |
| Mean         |              | 10.41 |              | 12.17 |              | 9.00 |              | 9.14 |              | 8.77 |              | 8.70 |
| SD           |              | 6.88  |              | 7.08  |              | 6.38 |              | 6.16 |              | 6.38 |              | 6.49 |
| Median       |              | 9.92  |              | 11.05 |              | 8.29 |              | 7.85 |              | 7.19 |              | 7.05 |

**Table S2:** SatDNA transcription on different tissues. Combined column refers to sum of all samples transcription for each satDNA family.

| SatDNA Family | Samples         |               |                |              |            |            |
|---------------|-----------------|---------------|----------------|--------------|------------|------------|
|               | Female antennae | Male antennae | Nymph antennae | Female gonad | Male gonad | Combined   |
| RproSat01-165 | 25875.90        | 194766.25     | 90631.36       | 98288.63     | 49236.27   | 458798.40  |
| RproSat02-169 | 164382.27       | 352430.66     | 161782.36      | 188298.61    | 95682.18   | 962576.08  |
| RproSat03-124 | 203899.45       | 166091.61     | 183193.65      | 52106.77     | 45935.85   | 651227.33  |
| RproSat04-133 | 13183.29        | 14567.82      | 22169.00       | 13432.51     | 13891.77   | 77244.39   |
| RproSat05-208 | 502077.44       | 170443.52     | 240119.34      | 105958.55    | 88481.26   | 1107080.11 |
| RproSat06-136 | 228.99          | 2194.39       | 782.15         | 284.07       | 56887.24   | 60376.84   |
| RproSat07-375 | 47433.69        | 72728.47      | 60347.58       | 61440.54     | 28023.57   | 269973.85  |
| RproSat08-67  | 752.40          | 1880.91       | 2395.33        | 446.40       | 420.05     | 5895.08    |
| RproSat09-499 | 2878.73         | 7966.20       | 1148.78        | 1379.77      | 1260.16    | 14633.65   |
| RproSat10-104 | 8636.20         | 12336.55      | 15251.88       | 41677.30     | 18062.30   | 95964.23   |
| RproSat11-198 | 98.14           | 36.88         | 97.77          | 81.16        | 30.00      | 343.95     |
| RproSat13-293 | 1472.08         | 2046.87       | 1442.08        | 568.14       | 60.01      | 5589.19    |
| RproSat14-461 | 26595.58        | 24359.61      | 13858.68       | 10713.54     | 7560.96    | 83088.37   |
| RproSat15-161 | 392.55          | 387.25        | 317.75         | 0.00         | 1830.23    | 2927.78    |
| RproSat16-821 | 2846.02         | 1438.34       | 1613.18        | 2597.22      | 18002.29   | 26497.06   |
| RproSat17-584 | 785.11          | 848.25        | 1466.53        | 1582.68      | 2010.26    | 6692.83    |
| RproSat18-122 | 32.71           | 129.08        | 146.65         | 527.56       | 2850.36    | 3686.37    |
| RproSat19-201 | 0.00            | 0.00          | 0.00           | 527.56       | 450.06     | 977.62     |
| RproSat20-134 | 2944.16         | 4056.86       | 3544.11        | 2759.55      | 1350.17    | 14654.85   |
| RproSat21-167 | 327.13          | 958.89        | 708.82         | 243.49       | 30.00      | 2268.34    |
| RproSat22-980 | 0.00            | 36.88         | 97.77          | 40.58        | 41165.24   | 41340.47   |
| RproSat23-412 | 65.43           | 110.64        | 0.00           | 243.49       | 810.10     | 1229.66    |
| RproSat24-673 | 457.98          | 295.04        | 1075.45        | 4017.58      | 164030.87  | 169876.93  |
| RproSat25-84  | 1930.06         | 1143.30       | 2199.79        | 2759.55      | 4890.62    | 12923.32   |
| RproSat26-146 | 4154.54         | 2987.33       | 10412.34       | 40.58        | 30.00      | 17624.79   |
| RproSat28-199 | 948.67          | 977.33        | 464.40         | 1176.87      | 210.03     | 3777.30    |
| RproSat29-31  | 163.56          | 977.33        | 317.75         | 3205.95      | 660.08     | 5324.68    |
| RproSat30-201 | 163.56          | 92.20         | 0.00           | 121.74       | 1110.14    | 1487.65    |
| RproSat31-75  | 0.00            | 92.20         | 0.00           | 40.58        | 60.01      | 192.79     |
| RproSat32-59  | 163.56          | 424.13        | 24.44          | 40.58        | 0.00       | 652.71     |
| RproSat33-123 | 32.71           | 682.29        | 24.44          | 4139.32      | 3660.47    | 8539.23    |
| RproSat34-415 | 19202.47        | 177856.51     | 42309.30       | 324815.10    | 242700.88  | 806884.27  |
| RproSat35-279 | 130.85          | 461.01        | 24.44          | 81.16        | 60.01      | 757.47     |

**Table S3:** Results of Spearman correlation between satDNA transcription and abundance in different samples.

| Samples         | $r_s$ | p-value   |
|-----------------|-------|-----------|
| Combined        | 0.52  | 0.001728  |
| Female antennae | 0.58  | 0.0004624 |
| Male antennae   | 0.55  | 0.0008323 |
| Nymph antennae  | 0.64  | 6.42E-05  |
| Female gonad    | 0.40  | 0.0197    |
| Male gonad      | 0.41  | 0.01738   |

**Table S4.** Designed oligonucleotides for three main satellite DNA families of *Rhodnius prolixus*.

| SatDNA family | Oligonucleotide | Sequence                          |
|---------------|-----------------|-----------------------------------|
| RproSat01-165 | Rpro-165-F      | 5' CTCTAAATATCTCGTTTCCTACTCGACAG  |
|               | Rpro-165-R      | 5' CTTTAACTTCAAATATCTCGAAACTACTCG |
| RproSat02-169 | Rpro-169-F      | 5' ATTATGGCCGTTCTATATCTCCAC       |
|               | Rpro-169-R1     | 5' ATCTTCTACATTTATAGATCTGTGCAC    |
|               | Rpro-169-R2     | 5' GTACAAGAGAACAAAATTCCATACCA     |
| RproSat03-124 | Rpro-124-F      | 5' CGGGTCTAGCCTATAACCGC           |
|               | Rpro-124-R      | 5' TAGACCCGCAAAGCTAAGATGTATTG     |
